# Supplementary material
Source: publisher site journal article supplement (https://www.dovepress.com/article/433682)
Supplement: Supplementary file 1 [file get_supplementary_file.php]

| Table S1. Definitions | |
| --- | --- |
| Acute pancreatitis (1) | Fulfillment of two of the following three criteria: 1) acute onset of epigastric pain; 2) blood amylase and/or lipase levels >3 times higher than normal; and 3) imaging examination (eg, abdominal ultrasound, enhanced CT, and MRI) revealing typical findings of acute pancreatitis. |
| Pancreatic necrosis (1) | Enhanced CT (CECT) showing areas of non-enhancing pancreatic parenchyma |
| Peripancreatic necrosis (1) | Enhanced CT (CECT) shows enhanced pancreatic parenchyma with a heterogeneous peripancreatic non-fluid component |
| Infected pancreatic necrosis (1) | One of the following: a) gas configurations on contrast-enhanced CT or b) a positive culture obtained during the first drainage and/or operative necrosectomy. |
| Organ failure(2) |  |
| Circulatory failure | Circulatory systolic blood pressure <90 mm Hg, despite adequate fluid resuscitation, or need for vasopressor support |
| Pulmonary failure | PaO2/ FIO2 <300, or need for mechanical ventilation. |
| Renal failure | Creatinine level ≥177 umol/L after rehydration or new need for hemofiltration or hemodialysis |
| Persistent organ failure (1) | Organ failure persists for >48 h. |
| Multiple organ failure (1) | Number of organs in failure ≥2. |
| Early organ failure | Occurrence of organ failure within the first seven days after admission |
| New-onset organ failure | New Organ Failure after 7 Days of Hospital Admission |
| Early enteral nutrition | Enteral nutrition within 48-72 hours of admission. |
| Gastrointestinal hemorrhage (3) | Gastrointestinal hemorrhage was defined by the presence of hematemesis, melena, hematochezia or blood in the nasogastric tube. |
| Intra-abdominal hemorrhage(3) | Intra-abdominal hemorrhage was characterized by emanation of blood through drains, or contrast-enhanced CT findings consistent with intra-abdominal bleeding. |
| Pancreatic fistula (4) | Amylase levels in drains or periwound exudate were more than three times that of serum. |
| Abdominal compartment syndrome (5) | A sustained intra-abdominal pressure (IAP) >20 mmHg (with/without an abdominal perfusion pressure [APP] <60 mmHg) associated with new onset organ dysfunction/failure. |

1. Banks PA, Bollen TL, Dervenis C, Gooszen HG, Johnson CD, Sarr MG, et al. Classification of acute pancreatitis--2012: revision of the Atlanta classification and definitions by international consensus. Gut. 2013;62(1):102-11.<http://dx.doi.org/10.1136/gutjnl-2012-302779>.

2. Marshall JC, Cook DJ, Christou NV, Bernard GR, Sprung CL, Sibbald WJ. Multiple organ dysfunction score: a reliable descriptor of a complex clinical outcome. Critical care medicine. 1995;23(10):1638-52.<http://dx.doi.org/10.1097/00003246-199510000-00007>.

3. Andersson E, Ansari D, Andersson R. Major haemorrhagic complications of acute pancreatitis. The British journal of surgery. 2010;97(9):1379-84.<http://dx.doi.org/10.1002/bjs.7113>.

4. Cečka F, Jon B, Subrt Z, Ferko A. [Pancreatic fistula - definition, risk factors and treatment options]. Rozhledy v chirurgii : mesicnik Ceskoslovenske chirurgicke spolecnosti. 2013;92(2):77-84

5. Sosa G, Gandham N, Landeras V, Calimag AP, Lerma E. Abdominal compartment syndrome. Disease-a-month : DM. 2019;65(1):5-19.<http://dx.doi.org/10.1016/j.disamonth.2018.04.003>.

| TABLE S2 Baseline characteristics and clinical characteristics of patients with necrotising pancreatitis at admission to the hospital After PSM | | | |
| --- | --- | --- | --- |
|  | With Fistula（n=99） | Without Fistula(n=99) | p value |
| Age (years) | 46（37-53） | 48（38-56） | 0.429 |
| Male sex | 58 (58.6%) | 64 (64.6%) | 0.381 |
| Etiology of pancreatitis |  |  | 0.609 |
| Biliary | 40 (40.4%) | 47 (47.5%) |  |
| Hyperlipidemia | 35 (35.4%) | 35 (35.4%) |  |
| Alcohol | 8 (8.1%) | 5 (5.1%) |  |
| Others | 16（16.2%） | 12 (12.1%) |  |
| Smoking | 25（25.3%） | 34 (34.3%) | 0.162 |
| Drinking | 23（23.2%） | 30（30.3%） | 0.261 |
| Hypertension | 25（25.3%） | 19 (19.2%) | 0.305 |
| Diabetes mellitus | 15（15.2%） | 12 (12.1%) | 0.534 |
| WBC | 12.17（8.91-17.01） | 12.17（8.5-15.51） | 0.343 |
| PCT | 1.42（0.39-4.7） | 1.29（0.28-7.76） | 0.383 |
| Blood urea nitrogen | 7（4.4-11.1） | 6.5（4-11.5） | 0.613 |
| Albumin | 30.5（27.70-33.3） | 30.2（27.2-34.6） | 0.881 |
| ASA |  |  | 0.399 |
| 1 | 39(39.4%) | 48（48.5%） |  |
| 2 | 27(27.3%) | 25（25.3%） |  |
| 3 | 33(33.3%) | 26（26.3%） |  |
| CTSI | 6（4-9） | 6（5-9） | 0.436 |
| Extent of parenchymal necrosis |  |  | 0.485 |
| 1 | 24（32.9%） | 31（41.3%） |  |
| 2 | 24（32.9%） | 19（25.3%） |  |
| 3 | 25（34.2%） | 25（33.3%） |  |
| Location of parenchymal necrosis |  |  |  |
| Head | 28（28.3%） | 23（23.2%） | 0.416 |
| Neck | 27(27.3%) | 25（25.3%） | 0.747 |
| Body | 52（52.5%） | 56（56.6%） | 0.568 |
| Tail | 47（47.5%） | 40（40.4%） | 0.316 |
| Peripancreatic necrosis only | 26（26.3%） | 24（24.2%） | 0.744 |
| Early organ failurea | 66（66.7%） | 69 (69.7%) | 0.647 |
| Cardiovascular | 31（31.3%） | 27（27.3%） | 0.532 |
| Respiratory | 65（65.7%） | 68（68.7%） | 0.65 |
| Renal | 33（33.3%） | 28（28.3%） | 0.442 |
| Early persistent organ failureb | 62（62.6%） | 59(59.6%) | 0.662 |
| Cardiovascular | 29（29.3%） | 25（25.3%） | 0.523 |
| Respiratory | 61（61.6%） | 58（58.6%） | 0.663 |
| Renal | 33（33.3%） | 27（27.3%） | 0.353 |
| Early persistent multiple organ failurec | 37（37.4%） | 34（34.3%） | 0.657 |
| EEN | 19（19.2%） | 13（13.1%） | 0.247 |
| Early ICU-admission | 64（64.6%） | 62（62.6%） | 0.768 |
| Infected necrosisd | 69（69.7%） | 68（68.7%） | 0.878 |
| Prior interventione | 83（83.8%） | 80（80.8%） | 0.576 |
| Mortality | 25 (25.3%) | 22 (22.2%) | 0.616 |
| aICU admission within 7 days after admission. borgan failure within 7 days after admission. corgan failure within 7 days after admission. dbefore diagnosis fistula of the gastrointestinal tract. ebefore diagnosis fistula of the gastrointestinal tract. Abbreviations: WBC white blood cells, PCT procalcitonin, ASA American Society of Anesthesiologists, CTSI computer tomography severity index, EEN early enteral nutrition, ICU intensive care unit | | | |

| **Table S3** Univariate logistic regression analysis of the occurrence of a gastrointestinal fistula in patients with necrotizing pancreatitis | | | | | | | | |
| --- | --- | --- | --- | --- | --- | --- | --- | --- |
|  | Fistula of the gastrointestinal tract | | | | | | | |
|  | Overall | | Subgroup 1a | | Subgroup 2b | | Subgroup 3c | |
|  | OR (95% CI) | P value | OR (95% CI) | P value | OR (95% CI) | P value | OR (95% CI) | P value |
| Hypertension | 1.173（0.732-1.881） | 0.507 | 0.851（0.447-1.620） | 0.623 | 1.493（0.821-2.714) | 0.189 | 0.802（0.345-1.864） | 0.609 |
| Diabetes mellitus | 1.271（0.715-2.260） | 0.414 | 1.424（0.708-2.863） | 0.321 | 0.886(0.373-2.101) | 0.782 | 1.006（0.345-2.929） | 0.992 |
| WBC | 1.020（0.987-1.055） | 0.234 | 1.001（0.958-1.045） | 0.964 | 1.049(1.007-1.092) | 0.022 | 1.039（0.977-1.103） | 0.222 |
| PCT | 1.007（0.998-1.016） | 0.134 | 1.004（0.992-1.017） | 0.489 | 1.007(0.995-1.019) | 0.27 | 1.012（1.000-1.025） | 0.047 |
| Urea nitrogen | 1.037（1.009-1.066） | 0.009 | 1.026（0.990-1.063） | 0.165 | 1.044(1.009-1.080) | 0.013 | 1.051（0.999-1.105） | 0.053 |
| Albumin | 0.919（0.882-0.958） | <0.001 | 0.921（0.875-0.969） | 0.002 | 0.914(0.865-0.966) | 0.001 | 0.914（0.859-0.973） | 0.005 |
| CTSI | 1.243（1.138-1.357） | <0.001 | 1.157（1.037-1.292） | 0.009 | 1.292(1.148-1.453) | <0.001 | 1.278（1.109-1.471） | 0.001 |
| Pancreatic head and neck necrosis | 1.703（1.122-2.586） | 0.012 | 2.486（1.487-4.155） | 0.001 | 0.856(0.461-1.589） | 0.622 | 1.645（0.830-3.260） | 0.154 |
| Pancreatic body and tail necrosis | 1.606（1.058-2.437） | 0.026 | 1.037（0.622-1.729） | 0.89 | 3.067(1.630-5.771) | 0.001 | 1.761（0.884-3.509） | 0.108 |
| Early persistent cardiovascular failure | 2.424（1.530-3.843） | <0.001 | 1.653（0.893-3.060） | 0.109 | 3.111(1.745-5.544) | <0.001 | 3.774（1.933-7.365） | <0.001 |
| Early persistent respiratory failure | 1.839（1.214-2.787） | 0.004 | 1.080（0.648-1.798） | 0.768 | 3.655(1.943-6.876) | <0.001 | 4.994（1.923-12.972） | 0.001 |
| Early persistent renal failure | 2.396（1.540-3.730） | <0.001 | 1.637（0.910-2.946） | 0.1 | 2.770(1.568-4.894) | <0.001 | 3.047（1.567-5.925） | 0.001 |
| Early persistent multiple organ failure | 2.222（1.449-3.409） | <0.001 | 1.385（0.780-2.459） | 0.267 | 2.958（1.706-5.128） | <0.001 | 3.529（1.808-6.885） | <0.001 |
| EEN | 0.207（0.124-0.346） | <0.001 | 0.258（0.139-0.480） | <0.001 | 0.141(0.063-0.313) | <0.001 | 0.116（0.035-0.383） | <0.001 |
| Early ICU-admission | 1.722（1.126-2.633） | 0.012 | 1.193（0.712-2.001） | 0.502 | 2.875(1.528-5.408) | <0.001 | 3.019（1.243-7.337） | 0.015 |
| Infected necrosis | 2.696（1.747-4.460） | <0.001 | 1.849（1.096-3.120） | 0.021 | 3.490(1.883-6.469) | <0.001 | 2.055（1.051-4.017） | 0.035 |
| Prior intervention | 6.929（4.014-11.961） | <0.001 | 4.017（2.192-7.363） | <0.001 | 31.895(7.738-131.458) | <0.001 | 7.070（3.062-16.323） | <0.001 |
| arisk factors for the gastrointestinal fistula in the upper gastrointestinal tract, brisk factors for the gastrointestinal fistula in the lower gastrointestinal tract, crisk factors for the gastrointestinal fistula in patients admitted within 72 hours of onset of the disease. Abbreviations: WBC white blood cells, PCT procalcitonin, ASA American Society of Anesthesiologists, CTSI computer tomography severity index, EEN early enteral nutrition, ICU intensive care unit, OR odds ratio, CI confidence interval | | | | | | | | |
